# Supplementary material
Source: PubMed Central journal article supplement (PMC3999375)
Supplement: supp_cvq149_cvq149supp.pdf [file supp_cvq149_cvq149supp.pdf]

## **SUPPLEMENTARY MATERIAL**

### **Supplementary Methods**

#### **Echocardiography**

Mice were anaesthetised with isoflurane 2, 4, 7 and 28 days after surgery. Cardiac dimensions at systole and diastole were assessed by echocardiography (Diasus 10-22 MHz probe Dynamic Imaging, Livingstone, UK). The chest was shaved and the transducer was placed parasternally to obtain a 2D image of the myocardium. Images were saved and analysed offline using Diasus software (Dynamic Imaging). Left ventricle ejection fraction (%EF) was calculated as  $(\text{left ventricle end diastole area} - \text{left ventricle end systolic area}) / \text{left ventricle end diastolic area} \times 100$  ((LVEDA-LVESA)/LVEDA x 100) in short axis images, as we have previously described (1, 2 below). The observer was blinded for the purpose of echocardiography measurements and all other analysis of tissue.

#### **Immunohistochemistry**

Paraffin embedded sections (5 $\mu$ m) were deparaffinised and rehydrated through ethanol for use in immunohistochemistry. After blocking, slides were incubated with rat anti-mouse monoclonal anti-mac 2 antibody (1:6000 clone M3/38 Cedarlane, UK) for 16 hours at 4°C or mouse anti-mouse  $\alpha$  smooth muscle actin (1:400 clone 1A4 Sigma) for 1 hour at room temperature. Subsequent incubation in biotinylated rabbit anti-rat and goat anti-mouse secondary antibodies (1:200 Vector, Peterborough, UK) for 1 hour and 30 minutes respectively at room temperature was followed by extravidin peroxidase (1:200 Sigma).

Peroxidase activity was detected with the 3,3-diaminobenzidine kit (Vector). Sections were counterstained with haematoxylin, dehydrated and mounted in DPX resin (Fluka).

Antigens were retrieved with citrate buffer pH6.0, Proteinase K (20µg/ml Roche, Oxford, UK) or Trypsin and 2N HCl prior to blocking and primary antibody incubation with rabbit anti-mouse polyclonal anti-YM1 antibody (1:50 Stem cell Technologies, France) for 1 hour at room temperature, rat anti-mouse monoclonal anti-CD31 (PECAM-1) antibody (1:50 clone MEC 13.3 BD Pharmingen, UK) for 16 hours at 4°C or mouse anti-mouse monoclonal anti-BrdU antibody (1:1000 clone BU 33 Sigma) for 1 hour at 37°C. Biotinylated goat anti-rabbit, rabbit anti-rat or goat anti-mouse secondary antibodies (1/200 Vector) were incubated with the slides for 30 minutes at room temperature followed by extravidin peroxidase (1:200 Sigma). Peroxidase activity was detected with a 3,3-diaminobenzidine kit (Vector). Sections were counterstained with haematoxylin, dehydrated and mounted in DPX resin (Fluka).

## References

- (1) Denvir, MA *et al.* (2005) Influence of scanning frequency and ultrasonic contrast agent on reproducibility of left ventricular measurements in the mouse. *J Am Soc Echo* 18, 155-162
- (2) Pepys MP *et al.* (2006) Targeting C-reactive protein for treatment of cardiovascular disease. *Nature* 440:1217-21

## Supplementary Figures

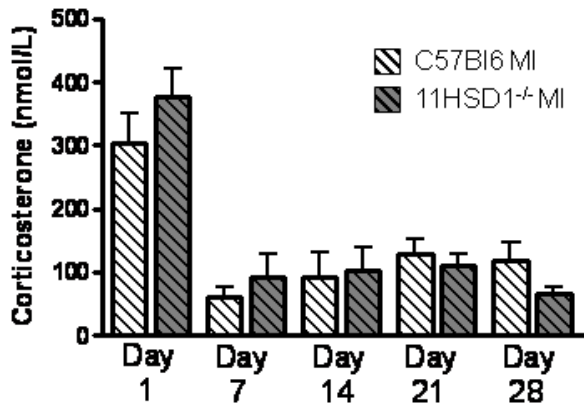

**Supplementary Figure 1. Circulating corticosterone up to 28 days after myocardial infarction (MI) surgery.** The concentration of corticosterone in plasma collected at the morning nadir was evaluated by radioimmunoassay. Data are expressed as mean  $\pm$  SEM (n=6 C57Bl6 (light bars) and 11 $\beta$ HSD1<sup>-/-</sup> (darker bars) at day 1 after MI; n=10 C57Bl6 and n=9 11 $\beta$ HSD1<sup>-/-</sup> at day 7, 14, 21 and 28 after MI).

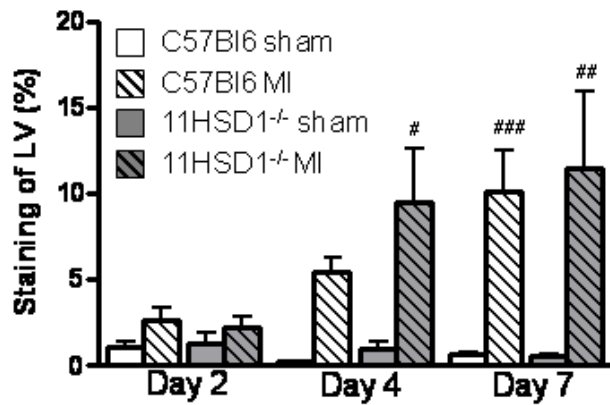

**Supplementary Figure 2: Myofibroblast activation during infarct healing.** Activation was detected by  $\alpha$ SMA immunoreactivity and quantified as percentage staining of the LV. Data are presented as the mean  $\pm$  SEM (n=8 C57Bl6 sham; n=12 C57Bl6 MI; n=4 11 $\beta$ HSD1<sup>-/-</sup> sham; n=6 11 $\beta$ HSD1<sup>-/-</sup> MI. #P<0.05, ##P<0.01, ###P<0.001 compared to matched sham.

**Supplementary Table 1: Ejection fractions pre-operatively (pre-op) and after sham-operation (sham) or myocardial infarction (MI).**

|                                               | Pre-op        | Day2          |                 | Day 4         |                 | Day 7         |                  |
|-----------------------------------------------|---------------|---------------|-----------------|---------------|-----------------|---------------|------------------|
|                                               |               | Sham          | MI              | Sham          | MI              | Sham          | MI               |
| <b>C57BL/6</b>                                | 69.7<br>± 2.7 | 63.1<br>± 2.8 | 27.8<br>± 2.4 # | 69.6<br>± 2.5 | 28.7<br>± 1.6 # | 63.6<br>± 4.5 | 29.1<br>± 2.7 #  |
| <b>11<math>\beta</math>HSD1<sup>-/-</sup></b> | 66.4<br>± 3.9 | 68.8<br>± 1.5 | 32.9<br>± 3.5 # | 67.0<br>± 5.0 | 31.8<br>± 1.6 # | 65.4<br>± 4.0 | 40.1<br>± 1.6 #* |

Ejection fraction was calculated from the LV end diastolic area (LVEDA) and LV end systolic area (LVESA) and is expressed as a percentage. Data is presented as mean  $\pm$  SEM (pre-operative values n=8; sham-operated C57Bl/6 n=8; MI C57Bl/6 n=12, sham-operated 11HSD1<sup>-/-</sup> n=4; MI 11HSD1<sup>-/-</sup> n=6). # P<0.01 vs sham control; \* P<0.05 vs MI in C57BL/6 group.
